# Supplementary material for: Evaluation of the Relationship Between Urinary Tract Infections and Toilet Habits and Post-Toilet Cleaning Behaviors in Women: A Questionnaire-Based Study
Source: Research Square preprint supplement (doi:10.21203/rs.3.rs-7762222/v1), 2025-12-05
Supplement: Supplementary file 1 [file 4869534eb57a3c0603a974ff.docx]

# Questionnaire

Age:

Chronic disease:

Marital status:

- Married / Single

Education level:

- ☐ Primary school  ☐ High school  ☐ University

Vaginal discharge:

Vaginal douching:

What type of toilet do you generally prefer?

- ☐ Squat toilet (Turkish style)
  ☐ Sitting toilet (Western style)

What type of toilet do you prefer at home?

- ☐ Squat toilet (Turkish style)
  ☐ Sitting toilet (Western style)

What type of toilet do you prefer in public places?

- ☐ Squat toilet (Turkish style)
  ☐ Sitting toilet (Western style)

How often do you use a sitting toilet (Western style)?

- ☐ Never or rarely
  ☐ Frequently or always

Personal cleaning direction after toilet use:

- ☐ From front to back
  ☐ Other

Do you use toilet paper after using the toilet?

- ☐ Yes
  ☐ No
